# Supplementary material for: Monitoring aromatic ring-currents in Mg-porphyrin by time-resolved circular dichroism
Source: Royal Society of Chemistry journal article supplement (doi:10.1039/d0cp04815a), 2020-01-01
Supplement: d0cp04815a1.pdf [file d0cp04815a1.pdf]

# Monitoring Aromatic Ring-Currents in Mg-porphyrin by Time-Resolved Circular Dichroism

Yeonsig Nam<sup>1,2</sup>, Jérémy R. Rouxel<sup>1</sup>, Jin Yong Lee<sup>2</sup>, and Shaul Mukamel<sup>1</sup>

<sup>1</sup>Department of Chemistry, University of California, Irvine, California  
92697-2025, USA

<sup>2</sup>Department of Chemistry, Sungkyunkwan University, Suwon, South Korea,  
16419

October 27, 2020

## Contents

|   |                                                                               |   |
|---|-------------------------------------------------------------------------------|---|
| 1 | Details of the time-resolved circular dichroism signal calculation            | 2 |
| 2 | Quantum simulation results                                                    | 7 |
| 3 | Time-dependent density matrix elements and Average transition current density | 8 |

# 1 Details of the time-resolved circular dichroism signal calculation

We start with the minimal coupling Hamiltonian, retaining only the current density term:

$$H_{\text{int}} = - \int d\mathbf{r} \mathbf{j}(\mathbf{r}) \cdot \mathbf{A}(\mathbf{r}, t) \quad (1)$$

where  $\mathbf{j}(\mathbf{r})$  is transition current density and  $\mathbf{A}(\mathbf{r}, t)$  is a vector potential of incoming pulse. The heterodyne-detected signal is defined as the change of the number of photons in a given time,

$$S(\Gamma) = \int dt \langle \dot{N}_s \rangle \quad (2)$$

where,  $\Gamma$  indicates the set of parameters, i.e. incoming pulses central frequencies, durations, etc.

$$\dot{N}_s = \frac{i}{\hbar} [H_{\text{int}}, N_s] = -\frac{i}{\hbar} \left[ \int d\mathbf{r} \mathbf{j}(\mathbf{r}) \mathbf{A}(\mathbf{r}, t), a_s^\dagger a_s \right] \quad (3)$$

The vector potential  $\mathbf{A}(\mathbf{r}, t)$  can be expressed as the following:

$$\mathbf{A}(\mathbf{r}, t) = \sqrt{\frac{\hbar}{2\epsilon_0\omega_s\Omega}} (a_s \boldsymbol{\varepsilon} e^{i(\mathbf{k}_s \cdot \mathbf{r} - \omega_s t)} + a_s^\dagger \boldsymbol{\varepsilon}^* e^{-i(\mathbf{k}_s \cdot \mathbf{r} - \omega_s t)}) \quad (4)$$

where  $\boldsymbol{\varepsilon}$  is the electric field polarization vectors. Hence, it gives

$$\dot{N}_s = -\frac{i}{\hbar} \int d\mathbf{r} \mathbf{j}(\mathbf{r}) \cdot [\mathbf{A}(\mathbf{r}, t), a_s^\dagger a_s] = -\frac{2}{\hbar} \text{Im} \int d\mathbf{r} \mathbf{j}(\mathbf{r}) \cdot \mathbf{A}^*(\mathbf{r}, t) \quad (5)$$

Therefore, the heterodyne-detected signal is

$$S(\Gamma) = -\frac{2}{\hbar} \text{Im} \int d\mathbf{r} dt \langle \mathbf{j}(\mathbf{r}, t) \cdot \mathbf{A}^*(\mathbf{r}, t) \rangle \quad (6)$$

The heterodyne-detected signal for Fig. S1 corresponds to

$$S(\Gamma) = -\frac{2}{\hbar} \text{Im} \int d\mathbf{r} dt d\mathbf{r}_3 dt_3 d\mathbf{r}_2 dt_2 d\mathbf{r}_1 dt_1 \left(-\frac{i}{\hbar}\right)^3 \langle j_{\text{left}}(\mathbf{r}, t) j_{\text{left}}^\dagger(\mathbf{r}_3, t_3) j_{\text{right}}^\dagger(\mathbf{r}_2, t_2) j_{\text{right}}(\mathbf{r}_1, t_1) \rangle A_s^*(\mathbf{r}, t) A_s(\mathbf{r}_3, t_3) A_{\text{pu}}(\mathbf{r}_2, t_2) A_{\text{pu}}^*(\mathbf{r}_1, t_1) \quad (7)$$

The  $A_s$  and  $A_{\text{pu}}$  is the vector potential of a probe and pump pulse respectively. The subscript left and right indicates the Liouville space superoperators defined by  $O_{\text{left}}\rho = O\rho$  and  $O_{\text{right}}\rho = \rho O$ . Upon expanding to first order in the probe and taking the difference between left and right polarization of the probe, we get

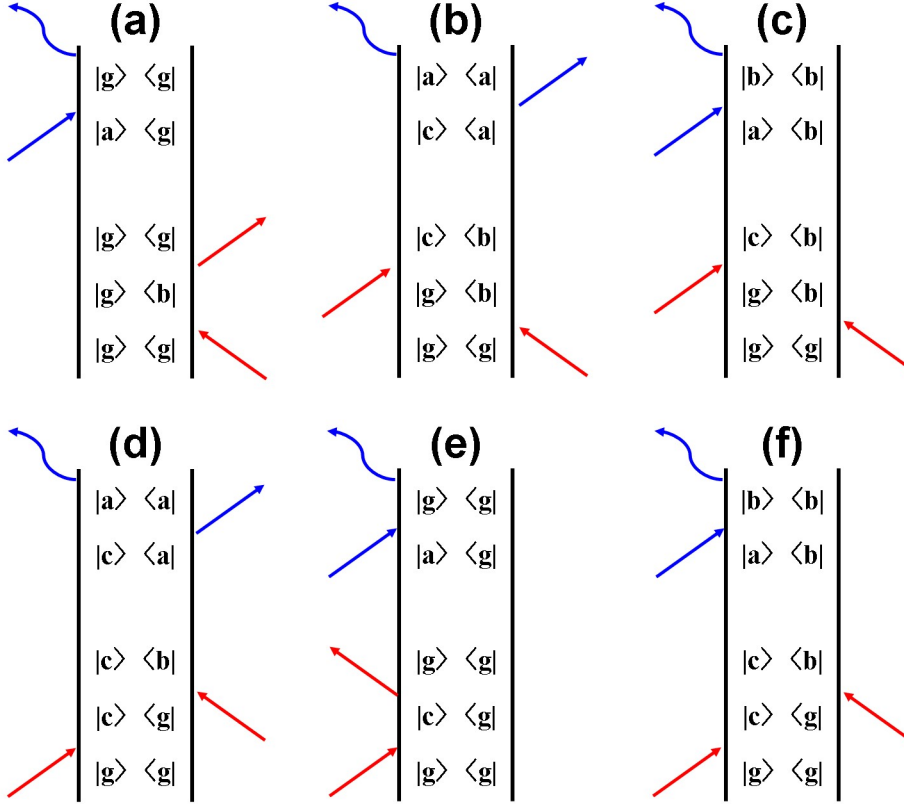

Figure. S 1: Possible pump-probe ladder diagrams.  $t_1$ ,  $t_2$ , and  $t_3$  refer to the time interval between interaction. Red and blue arrow indicates UV pump and X-ray probe interaction, respectively.

$$\begin{aligned}
S_{jj}(\Gamma) &= -\frac{2}{\hbar} \text{Im} \int d\mathbf{r} d\mathbf{t} d\mathbf{r}_1 d\mathbf{t}_1 \left( -\frac{i}{\hbar} \left[ \langle j_{\text{left}}(\mathbf{r}, t) j_{\text{left}}^\dagger(\mathbf{r}_1, t - t_1) \rangle A_s^*(\mathbf{r}, t) A_s(\mathbf{r}_1, t - t_1) \right. \right. \\
&\quad \left. \left. - \langle j_{\text{left}}(\mathbf{r}, t) j_{\text{right}}^\dagger(\mathbf{r}_1, t - t_1) \rangle A_s^*(\mathbf{r}, t) A_s(\mathbf{r}_1, t - t_1) \right] \right) \\
&= \frac{2}{\hbar^2} \text{Re} \int d\mathbf{r} d\mathbf{t} d\mathbf{r}_1 d\mathbf{t}_1 \left[ \langle \langle j(\mathbf{r}) | \mathcal{G}(t_1) j_{\text{left}}^\dagger(\mathbf{r}_1) | \rho(t - t_1) \rangle \rangle A_s^*(\mathbf{r}, t) A_s(\mathbf{r}_1, t - t_1) \right. \\
&\quad \left. - \langle \langle j(\mathbf{r}) | \mathcal{G}(t_1) j_{\text{right}}^\dagger(\mathbf{r}_1) | \rho(t - t_1) \rangle \rangle A_s^*(\mathbf{r}, t) A_s(\mathbf{r}_1, t - t_1) \right] \\
&= \frac{2}{\hbar^2} \text{Re} \int d\mathbf{r} d\mathbf{t} d\mathbf{r}_1 d\mathbf{t}_1 \left[ \langle \langle j(\mathbf{r}) | \mathcal{G}(t_1) j_{\text{left}}^\dagger(\mathbf{r}_1) | \rho(t - t_1) \rangle \rangle \right. \\
&\quad \left. - \langle \langle j(\mathbf{r}) | \mathcal{G}(t_1) j_{\text{right}}^\dagger(\mathbf{r}_1) | \rho(t - t_1) \rangle \rangle \right] (\epsilon_L^* \epsilon_L - \epsilon_R^* \epsilon_R) A_s^*(\mathbf{r}, t) A_s(\mathbf{r}_1, t - t_1) e^{-ik_s r + ik_s r_1} e^{i\omega_s t_1}
\end{aligned} \tag{8}$$

Using that  $\varepsilon_L^{a*} \varepsilon_L^b - \varepsilon_R^{a*} \varepsilon_R^b = (-i)\varepsilon_{abz}$ , where  $\varepsilon_{abz}$  is a Levi-Civita symbol and summing over electronic eigenstates, we get

$$S_{\text{CD}} = \frac{2}{\hbar^2} \text{Im} \int d\mathbf{r} d\mathbf{t} d\mathbf{r}_1 d\mathbf{t}_1 \varepsilon_{abz} [\langle \langle \mathbf{j}^a(\mathbf{r}) | \mathcal{G}(t_1) \mathbf{j}_{\text{left}}^{\dagger b}(\mathbf{r}_1) | \rho(t-t_1) \rangle \rangle - \langle \langle \mathbf{j}^a(\mathbf{r}) | \mathcal{G}(t_1) \mathbf{j}_{\text{right}}^{\dagger b}(\mathbf{r}_1) | \rho(t-t_1) \rangle \rangle] \mathbf{A}_s^*(\mathbf{r}, t) \mathbf{A}_s(\mathbf{r}_1, t-t_1) e^{-i\mathbf{k}_s \mathbf{r} + i\mathbf{k}_s \mathbf{r}_1} e^{i\omega_s t_1} \quad (9)$$

and

$$\langle \langle ab | \mathbf{j}_L - \mathbf{j}_R | cd \rangle \rangle = \mathbf{j}_{ac} \delta_{bd} - \mathbf{j}_{bd} \delta_{ac} \quad (10)$$

then,

$$\begin{aligned} S_{\text{CD}} &= \frac{2}{\hbar^2} \text{Im} \int d\mathbf{r} d\mathbf{t} d\mathbf{r}_1 d\mathbf{t}_1 [\langle \langle \mathbf{j}(\mathbf{r}) \times | \mathcal{G}(t_1) \mathbf{j}_{-}^{\dagger}(\mathbf{r}_1) | \rho(t-t_1) \rangle \rangle] \mathbf{A}_s^*(\mathbf{r}, t) \mathbf{A}_s(\mathbf{r}_1, t-t_1) e^{-i\mathbf{k}_s \mathbf{r} + i\mathbf{k}_s \mathbf{r}_1} e^{i\omega_s t_1} \\ &= \frac{2}{\hbar^2} \text{Im} \int d\mathbf{t} d\mathbf{t}_1 [\langle \langle \mathbf{j}(\mathbf{k}_s) \times | \mathcal{G}(t_1) \mathbf{j}_{-}^{\dagger}(-\mathbf{k}_s) | \rho(t-t_1) \rangle \rangle] \mathbf{A}_s^*(t) \mathbf{A}_s(t-t_1) e^{i\omega_s t_1} \\ &= \frac{2}{\hbar^2} \text{Im} \sum_{abc} \int d\mathbf{t} d\mathbf{t}_1 (\mathbf{j}_{ba}(\mathbf{k}_s) \times) e^{-i\omega_{ab} t_1 - \Gamma_{ab} t_1} [\mathbf{j}_{ac}^{\dagger}(-\mathbf{k}_s) \delta_{bd} - \mathbf{j}_{bd}^{\dagger}(-\mathbf{k}_s) \delta_{ac}] \rho_{cd}(t-t_1) \mathbf{A}_s^*(t) \mathbf{A}_s(t-t_1) e^{i\omega_s t_1} \end{aligned} \quad (11)$$

where  $\mathbf{j}_{-}$  denotes the Liouville space current density superoperator defined by  $\mathbf{j}_{-}\rho = \mathbf{j}\rho - \rho\mathbf{j}$ .

$$S_{\text{CD}} = \frac{2}{\hbar^2} \text{Im} \sum_{abc} \int d\mathbf{t} d\mathbf{t}_1 [\mathbf{j}_{ba}(\mathbf{k}_s) \times \mathbf{j}_{ac}^{\dagger}(-\mathbf{k}_s) e^{i(\omega_s - \omega_{ab})t_1 - \Gamma_{ab} t_1} \rho_{cb}(t-t_1) - \mathbf{j}_{ba}(\mathbf{k}_s) \times \mathbf{j}_{bc}^{\dagger}(-\mathbf{k}_s) e^{i(\omega_s - \omega_{ab})t_1 - \Gamma_{ab} t_1} \rho_{ac}(t-t_1)] \mathbf{A}_s^*(t) \mathbf{A}_s(t-t_1) \quad (12)$$

Rearranging the sums to factorized out the density matrix after the pump, we get

$$S_{\text{CD}}(\mathbf{k}_s, \omega_s) = \frac{2}{\hbar^2} \text{Im} \sum_{abc} \int d\mathbf{t} d\mathbf{t}_1 \mathbf{A}_s^*(t) \mathbf{A}_s(t-t_1) \rho_{cb}(t-t_1) [\mathbf{j}_{ba}(\mathbf{k}_s) \times \mathbf{j}_{ac}^{\dagger}(-\mathbf{k}_s) e^{i(\omega_s - \omega_{ab})t_1 - \Gamma_{ab} t_1} - \mathbf{j}_{ac}(\mathbf{k}_s) \times \mathbf{j}_{ab}^{\dagger}(-\mathbf{k}_s) e^{i(\omega_s - \omega_{ca})t_1 - \Gamma_{ca} t_1}] \quad (13)$$

In the impulsive limit,  $\mathbf{A}_s(t) = \delta(t-T)\mathbf{A}_s$ ,  $\mathbf{A}_s(t-t_1) = \delta(t-t_1-T)\mathbf{A}_s$ , where  $t \rightarrow T$ , and  $t_1 \rightarrow 0$ .

We now express explicitly  $\rho_{cb}(T)$ . At second order in the pump interaction (Fig S4), we have

$$\begin{aligned} \rho_{cb}(T) &= \langle \langle cb | \rho(T) \rangle \rangle \\ &= -\left(\frac{-i}{\hbar}\right)^2 \int d\mathbf{r}_1 d\mathbf{r}_2 d\mathbf{t}_1 d\mathbf{t}_2 \langle \langle cb | \mathbf{j}_{-}(\mathbf{r}_2, t_2) \mathbf{j}_{-}(\mathbf{r}_1, t_1) | \rho(T-t_1-t_2) \rangle \rangle \mathbf{A}_{\text{pu}}^*(\mathbf{r}_2, T-t_2) \mathbf{A}_{\text{pu}}(\mathbf{r}_1, T-t_2-t_1) \\ &= -\left(\frac{-i}{\hbar}\right)^2 \int d\mathbf{r}_1 d\mathbf{r}_2 d\mathbf{t}_1 d\mathbf{t}_2 \left( \langle \langle cb | \mathcal{G}(t_2) \mathbf{j}_{\text{right}}(\mathbf{r}_2) \mathcal{G}(t_1) \mathbf{j}_{\text{left}}^{\dagger}(\mathbf{r}_1) | \rho(t_0) \rangle \rangle \mathbf{A}_{\text{pu}}^*(\mathbf{r}_2, T-t_2) \mathbf{A}_{\text{pu}}(\mathbf{r}_1, T-t_2-t_1) \right. \\ &\quad \left. + \langle \langle cb | \mathcal{G}(t_2) \mathbf{j}_{\text{left}}^{\dagger}(\mathbf{r}_2) \mathcal{G}(t_1) \mathbf{j}_{\text{right}}(\mathbf{r}_1) | \rho(t_0) \rangle \rangle \mathbf{A}_{\text{pu}}(\mathbf{r}_2, T-t_2) \mathbf{A}_{\text{pu}}^*(\mathbf{r}_1, T-t_2-t_1) \right) \quad (14) \end{aligned}$$

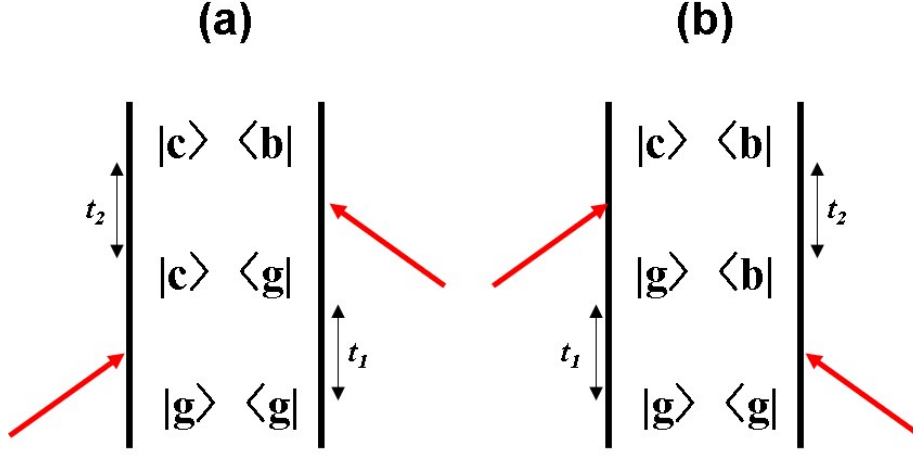

Figure. S 2: Ladder diagrams for pump interaction.  $t_1$  and  $t_2$ , refer to the time interval between two pump interactions.

Since,  $\rho(t_0) = |gg\rangle\rangle$

$$\begin{aligned}
\rho_{cb}(T) &= \left(\frac{1}{\hbar}\right)^2 \int d\mathbf{r}_1 d\mathbf{r}_2 dt_1 dt_2 \left( \mathcal{G}_{cb,cb}(t_2) j_{bg}(\mathbf{r}_2) \mathcal{G}_{cg,cg}(t_1) j_{cg}^\dagger(\mathbf{r}_1) A_{\text{pu}}^*(\mathbf{r}_2, T-t_2) A_{\text{pu}}(\mathbf{r}_1, T-t_2-t_1) \right. \\
&\quad \left. + \mathcal{G}_{cb,cb}(t_2) j_{cg}^\dagger(\mathbf{r}_2) \mathcal{G}_{gb,gb}(t_1) j_{bg}(\mathbf{r}_1) A_{\text{pu}}(\mathbf{r}_2, T-t_2) A_{\text{pu}}^*(\mathbf{r}_1, T-t_2-t_1) \right) \\
&= \frac{1}{\hbar^2} \int dt_1 dt_2 \left( e^{-i\omega_{cb}t_2 - \Gamma_{cb}t_2} e^{-i\omega_{cg}t_1 - \Gamma_{cg}t_1} j_{bg}(\mathbf{k}_{\text{pu}}) j_{cg}^\dagger(-\mathbf{k}_{\text{pu}}) A_{\text{pu}}^*(T-t_2) A_{\text{pu}}(T-t_2-t_1) \right. \\
&\quad \left. + e^{-i\omega_{cb}t_2 - \Gamma_{cb}t_2} e^{-i\omega_{gb}t_1 - \Gamma_{gb}t_1} j_{cg}^\dagger(-\mathbf{k}_{\text{pu}}) j_{bg}(\mathbf{k}_{\text{pu}}) A_{\text{pu}}(T-t_2) A_{\text{pu}}^*(T-t_2-t_1) \right) \quad (15)
\end{aligned}$$

In the impulsive limit,  $A_{\text{pu}}(t) = \delta(t)A_{\text{pu}}$ , where  $t_2 \rightarrow T$ , and  $t_1 \rightarrow 0$ . The Fourier transform of pump pulse in time-domain to frequency domain gives,

$$A_{\text{pu}}(T-t_1) = \int \frac{d\omega_1}{2\pi} A_{\text{pu}}(\omega_1) e^{-i\omega(T-t_1)} \quad (16)$$

and

$$\int_0^\infty dt_2 e^{i(\omega_1 - \omega_2 - \omega_{cb}t_2 - \Gamma_{cb}t_2)} = \frac{i}{\omega_1 - \omega_2 - \omega_{cb} + i\Gamma_{cb}} \quad (17)$$

Hence, the density matrix at waiting time  $T$  becomes,

$$\rho_{cb}(T) = -\frac{1}{\hbar^2} \int \frac{d\omega_1}{2\pi} \frac{d\omega_2}{2\pi} A_{\text{pu}}(\omega_1) A_{\text{pu}}(\omega_2) \left[ \frac{\mathbf{j}_{bg}(\mathbf{k}_{\text{pu}}) \cdot \boldsymbol{\varepsilon}_{\text{pu}}^* \cdot \mathbf{j}_{cg}^\dagger(-\mathbf{k}_{\text{pu}}) \cdot \boldsymbol{\varepsilon}_{\text{pu}} e^{i(\omega_2 - \omega_1)T}}{(\omega_1 - \omega_2 - \omega_{cb} + i\Gamma_{cb})(\omega_1 - \omega_{cg} + i\Gamma_{cg})} + \frac{\mathbf{j}_{cg}^\dagger(-\mathbf{k}_{\text{pu}}) \cdot \boldsymbol{\varepsilon}_{\text{pu}} \cdot \mathbf{j}_{bg}(\mathbf{k}_{\text{pu}}) \cdot \boldsymbol{\varepsilon}_{\text{pu}}^* e^{-i(\omega_2 - \omega_1)T}}{(-\omega_1 + \omega_2 - \omega_{cb} + i\Gamma_{cb})(-\omega_1 - \omega_{gb} + i\Gamma_{gb})} \right] \quad (18)$$

Likewise, the final TRCD signal becomes,

$$S_{\text{CD}}(\omega_s, T) = \frac{2}{\hbar^2} \frac{1}{(2\pi)^2} N\text{Re} \sum_{abc} A_s^*(\omega_s) A_s(\omega_s) \rho_{cb}(T) \left[ \frac{\mathbf{j}_{ba}(\mathbf{k}_s) \times \mathbf{j}_{ac}^\dagger(-\mathbf{k}_s)}{\omega_s - \omega_{ab} + i\Gamma_{ab}} - \frac{\mathbf{j}_{ac}(\mathbf{k}_s) \times \mathbf{j}_{ab}^\dagger(-\mathbf{k}_s)}{-\omega_s - \omega_{ca} + i\Gamma_{ca}} \right] \quad (19)$$

Finally, substituting  $a$ ,  $b$ , and  $c$  into  $c$ ,  $e'$ , and  $e$ , respectively, gives the final expression in the manuscript.

## 2 Quantum simulation results

We compared our quantum calculations with previous work of Rubio [1] which performed CASSCF calculations within the same active space (13o/18e) for the electronic structure calculation of the Mg-porphyrin. To that end, we computed transition energies (Table S1 and S2) and transition dipole moment (Fig. S3) of the Mg-porphyrin calculated at the CASSCF (13o/18e) level with  $C_1$  and  $D_{2h}$  symmetry option (note that the highest symmetry option in MOLPRO is  $D_{2h}$ ). By comparing the orbital configuration of each excited state of the active orbitals, we assigned our  $e_1, e_3, e_5,$  and  $e_7$  states to  $e_1$  to  $e_4$  states (Q band to N band) of Rubio’s work and those of  $D_{2h}$  symmetry. The  $e_1, e_3, e_5,$  and  $e_7$  states are originally doubly degenerate, however, they might split into several non-degenerate states due to the loss of symmetry [1, 2]: for example, the Q bands split into  $e_1$  and  $e_2$  states. Discrepancies of the computed transition energies compared to experimental data are due to the lack of dynamics correlation in CASSCF. However, our computation matches the results of the CASSCF calculation of Rubio [1] in terms of transition energies and orbital configurations. Moreover, the square of transition dipole moment with  $D_{2h}$  symmetry shows the same trend ( $e_1 < e_3, e_3 > e_5,$  and  $e_5 < e_7$ ). The small deviation from Rubio’s work mainly originates from the different basis set and since the oscillator strength was calculated with CASPT2 in that study. It is also consistent with experiment that the absorption of  $e_1$  is very weak and  $e_3$  shows the most intense absorption [3].

|       | CASSCF (13o/20e) with $C_1$ symmetry |                                                 |                                    |                                                                                                                         | Rubio’s work <sup>5</sup> : CASSCF (13o/18e) |                     |                                                                                        | Experiment <sup>1</sup> |
|-------|--------------------------------------|-------------------------------------------------|------------------------------------|-------------------------------------------------------------------------------------------------------------------------|----------------------------------------------|---------------------|----------------------------------------------------------------------------------------|-------------------------|
|       | Transition Energy                    | Square of the transition dipole moment, $\mu^2$ | Transition dipole moment direction | Main orbital configuration (with $D_{2h}$ notation)                                                                     | Transition Energy                            | Oscillator Strength | Main orbital configuration ( $D_{4h}$ )                                                | Transition Energy       |
| $e_1$ | 3.125                                | 0.199                                           | x                                  | $6B_{1u} \rightarrow 4B_{2g} (B_{3u})$<br>$2A_u \rightarrow 4B_{3g} (B_{3u})$                                           | 3.05                                         | 0.008               | $4a_{2u} \rightarrow 4e_g$<br>$1a_{1u} \rightarrow 4e_g$                               | 2.14                    |
| $e_2$ | 3.157                                | 0.748                                           | y                                  | $6B_{1u} \rightarrow 4B_{3g} (B_{2u})$<br>$2A_u \rightarrow 4B_{2g} (B_{2u})$                                           |                                              |                     |                                                                                        |                         |
| $e_3$ | 5.051                                | 14.054                                          | x                                  | $6B_{1u} \rightarrow 4B_{2g} (B_{3u})$<br>$2A_u \rightarrow 4B_{3g} (B_{3u})$<br>$4B_{1u} \rightarrow 4B_{2g} (B_{3u})$ | 4.95                                         | 0.923               | $4a_{2u} \rightarrow 4e_g$<br>$1a_{1u} \rightarrow 4e_g$<br>$3a_{2u} \rightarrow 4e_g$ | 3.18                    |
| $e_4$ | 5.274                                | 0.000                                           | y                                  | $3B_{3g} \rightarrow 4B_{2g} (B_{1g})$                                                                                  |                                              |                     |                                                                                        |                         |
| $e_5$ | 5.400                                | 20.418                                          | y                                  | $6B_{1u} \rightarrow 4B_{3g} (B_{2u})$<br>$2A_u \rightarrow 4B_{2g} (B_{2u})$                                           | 5.28                                         | 0.200               | $2b_{2u} \rightarrow 4e_g$                                                             | 3.40                    |
| $e_6$ | 5.492                                | 0.000                                           | x                                  | $3B_{2g} \rightarrow 4B_{2g} (A_g)$                                                                                     |                                              |                     |                                                                                        |                         |
| $e_7$ | 5.527                                | 6.413                                           | x                                  | $4B_{1u} \rightarrow 4B_{2g} (B_{3u})$                                                                                  | 5.83                                         | 0.379               | $3a_{2u} \rightarrow 4e_g$                                                             | 3.81                    |
| $e_8$ | 5.664                                | 0.000                                           | y                                  | $3B_{2g} \rightarrow 4B_{3g} (B_{1g})$                                                                                  |                                              |                     |                                                                                        |                         |
| $e_9$ | 5.793                                | 0.000                                           | x                                  | $3B_{3g} \rightarrow 4B_{3g} (A_g)$                                                                                     |                                              |                     |                                                                                        |                         |

Table S 1: Comparison of transition energies (eV), transition dipole moment (a.u.), main orbital configuration of Mg-porphyrin between this study (with  $C_1$  symmetry), Rubio’s work [1] and experimental results [3]. The main orbital configuration of  $C_1$  symmetry was converted to the orbital notations of  $D_{2h}$  symmetry for convenience.

| CASSCF (13o/20e) with $D_{2h}$ symmetry |                   |                                                 |                                    | Rubio's work <sup>3</sup> : CASSCF (13o/18e)                                                                         |                   |                     | Experiment <sup>1</sup>                                                                |                   |
|-----------------------------------------|-------------------|-------------------------------------------------|------------------------------------|----------------------------------------------------------------------------------------------------------------------|-------------------|---------------------|----------------------------------------------------------------------------------------|-------------------|
|                                         | Transition Energy | Square of the transition dipole moment, $\mu^2$ | Transition dipole moment direction | Main orbital configuration (Wavefunction symmetry)                                                                   | Transition Energy | Oscillator Strength | Main orbital configuration                                                             | Transition Energy |
| $e_1$                                   | 2.869             | 0.493                                           | x                                  | $2A_u \rightarrow 4B_{3g}(B_{3u})$<br>$6B_{1u} \rightarrow 4B_{2g}(B_{3u})$                                          | 3.05              | 0.008               | $4a_{2u} \rightarrow 4e_g$<br>$1a_{1u} \rightarrow 4e_g$                               | 2.14              |
| $e_1'$                                  | 2.869             | 0.493                                           | y                                  | $2A_u \rightarrow 4B_{2g}(B_{2u})$<br>$6B_{1u} \rightarrow 4B_{3g}(B_{2u})$                                          |                   |                     |                                                                                        |                   |
| $e_2$                                   | 4.836             | 16.945                                          | x                                  | $6B_{1u} \rightarrow 4B_{2g}(B_{3u})$<br>$2A_u \rightarrow 4B_{3g}(B_{3u})$<br>$4B_{1u} \rightarrow 4B_{2g}(B_{3u})$ | 4.95              | 0.923               | $4a_{2u} \rightarrow 4e_g$<br>$1a_{1u} \rightarrow 4e_g$<br>$3a_{2u} \rightarrow 4e_g$ | 3.18              |
| $e_2'$                                  | 4.836             | 16.945                                          | y                                  | $6B_{1u} \rightarrow 4B_{3g}(B_{2u})$<br>$2A_u \rightarrow 4B_{2g}(B_{2u})$<br>$4B_{1u} \rightarrow 4B_{3g}(B_{2u})$ |                   |                     |                                                                                        |                   |
| $e_3$                                   | 5.281             | 1.417                                           | x                                  | $5B_{1u} \rightarrow 4B_{2g}(B_{3u})$                                                                                | 5.28              | 0.200               | $2b_{2u} \rightarrow 4e_g$                                                             | 3.40              |
| $e_3'$                                  | 5.281             | 1.417                                           | y                                  | $5B_{1u} \rightarrow 4B_{3g}(B_{2u})$                                                                                |                   |                     |                                                                                        |                   |
| $e_4$                                   | 5.815             | 2.521                                           | x                                  | $4B_{1u} \rightarrow 4B_{2g}(B_{3u})$                                                                                | 5.83              | 0.379               | $3a_{2u} \rightarrow 4e_g$                                                             | 3.81              |
| $e_4'$                                  | 5.815             | 2.521                                           | y                                  | $4B_{1u} \rightarrow 4B_{3g}(B_{2u})$                                                                                |                   |                     |                                                                                        |                   |

Table S 2: Comparison of transition energies (eV), transition dipole moment (a.u.), main orbital configuration of Mg-porphyrin between this study (with  $D_{2h}$  symmetry), Rubio's work [1] and experimental results [3].

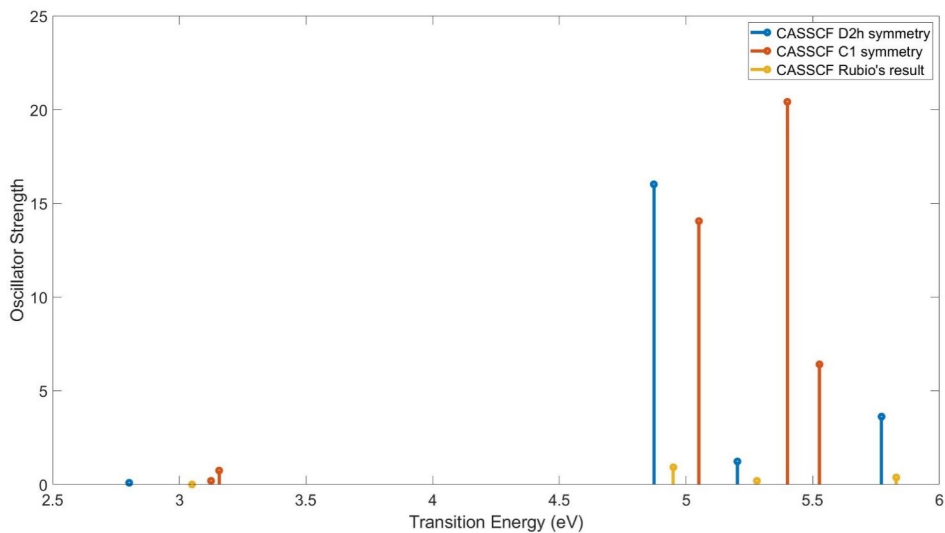

Figure. S 3: Stick spectra of the oscillator strength for the valence excitations from the ground state. Blue: CASSCF calculation with  $D_{2h}$  symmetry, Red: CASSCF calculation with  $C_1$  symmetry, Yellow: CASSCF result [1].

### 3 Time-dependent density matrix elements and Average transition current density



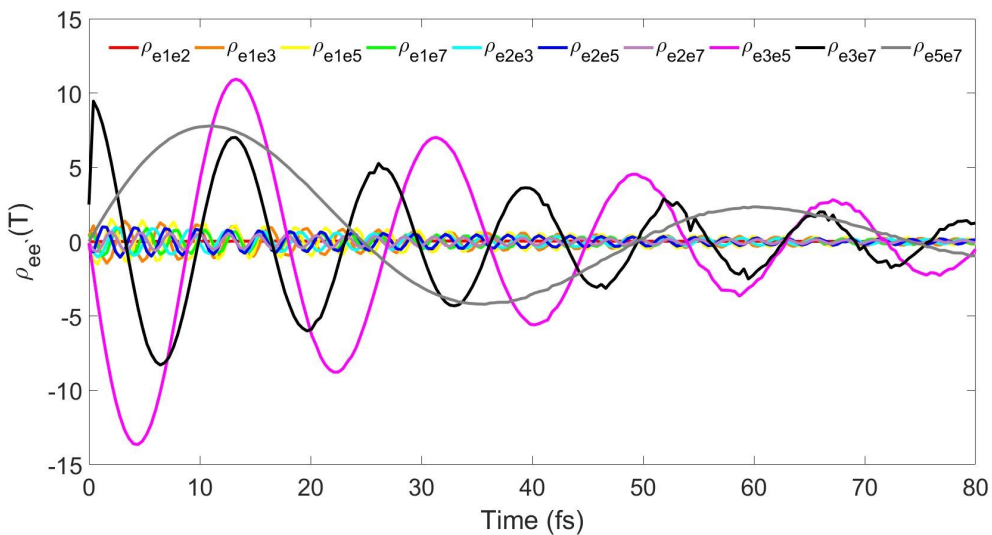

Figure. S 4: The time-dependent density matrix for various coherences of valence excited states. The density matrix originating only from  $e_1$ ,  $e_2$ ,  $e_3$ ,  $e_5$ , and  $e_7$  are shown.

| $\hat{j}_{ab}$ | $c_1$  |        | $c_2$  |        |
|----------------|--------|--------|--------|--------|
|                | $x$    | $y$    | $x$    | $y$    |
| $e_3$          | -7.137 | 2.086  | -7.137 | 2.087  |
| $e_5$          | -0.300 | -4.448 | -0.300 | -4.448 |
| $e_7$          | 0.245  | -5.231 | 0.245  | -5.231 |

Table S 3: The average transition current density value for the transition from  $e_3$ ,  $e_5$ , and  $e_7$  valence state to  $c_1$  and  $c_2$  core states in the real space ( $x$  and  $y$  component are separately shown, Unit:  $10^{-7} e/\text{bohr}^3$ ), where  $e$  is the electron charge.

## References

- [1] M. Rubio, B. O. Roos, L. Serrano-Andrés and M. Merchán, J. Chem. Phys., 1999, **110**, 7202-7209.
- [2] D. Sundholm, Chem. Phys. Lett., 2000, **317**, 392-399.
- [3] G. D. Dorough, J. R. Miller and F. M. Huennekens, J. Am. Chem. Soc., 1951, **73**, 4315-4320.
